# Supplementary material
Source: PubMed Central journal article supplement (PMC5070892)
Supplement: ejhg2015241x1.pdf [file ejhg2015241x1.pdf]

**Supplementary Table S1. Genotyping methods applied in each proband**

| Case No. | Sample ID | Sequence analysis of all exons |        |      |     |        |      |       |        |         |       | LCA APEX | ABCA4 APEX | USH APEX | CEP290 intronic mutation | Nijmegen screening |   |
|----------|-----------|--------------------------------|--------|------|-----|--------|------|-------|--------|---------|-------|----------|------------|----------|--------------------------|--------------------|---|
|          |           | AIPL1                          | CEP290 | CRB1 | CRX | GUCY2D | LRAT | RDH12 | RPE65  | RPGRIP1 | TULP1 |          |            |          |                          |                    |   |
| 1        | 063070    | R                              |        |      | R   | R(-)/N |      |       | R      |         |       |          |            |          |                          |                    | N |
| 2        | 063071    |                                |        | N/R  |     |        |      |       |        |         |       |          |            |          |                          |                    | N |
| 3        | 063072    | R                              |        |      |     | R      | R    |       | R      |         |       |          |            |          |                          |                    | N |
| 4        | 063073    | R                              | N      | R    | R   | R      | R    |       | R      |         | R     |          |            |          |                          |                    | N |
| 5        | 063074    | R                              | N      | R    | R   | R      | R    |       | R      |         | R     |          |            |          |                          |                    | N |
| 6        | 063075    | R                              |        | R    | R   | R      | R    |       | R      |         | R     |          |            |          |                          |                    | N |
| 7        | 063076    |                                |        |      | R   | R      |      |       |        |         |       | R; 2006  |            |          |                          |                    | N |
| 8        | 063077    | R                              |        | R    | R   | R      | R    |       | R      | R       |       |          |            |          |                          |                    | N |
| 9        | 063078    | R                              |        |      | R   | R      | R    |       | R      |         |       |          |            |          |                          |                    | N |
| 10       | 063079    |                                |        |      |     |        |      |       |        |         |       |          |            |          |                          |                    | N |
| 11       | 063080    | R                              |        | R    | R   | R      | R    |       | R      |         |       |          | R          |          |                          |                    | N |
| 12       | 063081    |                                |        |      |     |        |      |       | R      | R       |       |          |            |          |                          |                    | N |
| 12       | 063082    |                                |        |      |     |        |      |       |        |         |       | R; 2009  |            |          |                          |                    | N |
| 13       | 063083    | R                              |        |      | R   | R(-)/N | R    |       | R      | R       |       | R; 2006  |            |          |                          |                    | N |
| 14       | 063084    |                                |        |      |     |        |      |       | N      |         |       | R; 2011  |            |          |                          |                    | N |
| 15       | 063086    | R                              |        | R    | R   | R      | R    |       | R      | R       |       | R; 2006  |            |          | R                        |                    | N |
| 16       | 063087    |                                |        |      |     |        |      |       |        |         |       |          |            |          |                          |                    | N |
| 17       | 063088    |                                | N      |      | R   | R      | R    |       |        |         |       | R; 2006  |            |          |                          |                    | N |
| 18       | 063089    |                                |        | R    | R   | R      | R    |       | R      |         |       | R; 2006  |            |          | R                        |                    | N |
| 19       | 063090    | R                              |        | R    | R   | R      |      |       | R      |         |       | R; 2006  |            |          |                          |                    | N |
| 20       | 063091    | R                              |        | N    | R   | R      | R    |       | R      |         |       |          |            |          |                          |                    | N |
| 21       | 063092    | R                              |        |      | R   | R      | R    |       | R(-)/N |         |       | R; 2012  |            |          |                          |                    | N |
| 22       | 063093    | R                              |        | R    | R   | R      |      |       | R      |         | R     |          |            |          |                          |                    | N |
| 23       | 063094    | R                              | N      | R    | R   | R      | R    |       | R      |         | R     |          |            |          |                          |                    | N |

|    |        |     |   |   |   |   |   |  |     |   |   |         |  |   |   |   |
|----|--------|-----|---|---|---|---|---|--|-----|---|---|---------|--|---|---|---|
| 24 | 063095 | R   |   | R | R | R | R |  | R   | R |   |         |  |   |   | N |
| 25 | 063096 | R   |   |   |   | R | R |  | R   |   | R |         |  |   |   | N |
| 26 | 063097 |     |   |   |   | N |   |  |     |   |   | R; 2006 |  |   |   | N |
| 27 | 063098 |     | N |   |   |   |   |  |     |   |   | R; 2006 |  |   |   | N |
| 28 | 063099 | R/N |   | R | R | R | R |  | R   | R |   |         |  |   | R | N |
| 29 | 063101 |     |   |   | R | R | R |  | R/N |   |   | R; 2006 |  |   |   | N |
| 30 | 063103 | R   | N |   |   | R |   |  | R   |   |   |         |  |   |   | N |
| 31 | 063104 | R   |   |   | R | R |   |  | R/N |   | R |         |  |   |   | N |
| 32 | 063105 |     |   |   |   |   |   |  |     |   |   | R; 2009 |  |   |   | N |
| 33 | 063106 |     |   |   |   |   |   |  | N   |   |   | R; 2012 |  |   |   | N |
| 34 | 063107 |     |   |   |   |   |   |  |     |   |   | R; 2012 |  |   |   | N |
| 35 | 063108 |     |   |   |   |   |   |  |     |   |   | R; 2012 |  |   |   | N |
| 36 | 063109 |     |   |   |   |   |   |  |     |   |   |         |  |   |   | N |
| 37 | 063111 |     |   |   |   |   |   |  |     |   |   |         |  |   |   | N |
| 38 | 063112 |     |   |   |   |   |   |  | N   |   |   |         |  |   |   | N |
| 39 | 063113 |     |   |   |   |   |   |  |     |   |   |         |  |   |   | N |
| 40 | 063114 |     |   |   |   |   |   |  |     |   |   |         |  |   |   | N |
| 41 | 063115 |     |   |   |   |   |   |  |     |   |   |         |  |   |   | N |
| 42 | 063116 |     |   |   |   |   |   |  | N   |   |   |         |  |   |   | N |
| 43 | 063117 | N   |   |   |   |   |   |  |     |   |   |         |  |   |   | N |
| 44 | 063118 |     |   |   |   |   |   |  |     |   |   |         |  |   |   | N |
| 45 | 063119 |     |   | N |   |   |   |  |     |   |   |         |  |   |   | N |
| 46 | 063120 |     |   |   |   |   |   |  | N   |   |   | R; 2012 |  |   |   | N |
| 47 | 063121 |     |   |   |   |   |   |  |     |   |   |         |  |   |   | N |
| 48 | 063122 |     |   |   |   |   |   |  |     |   |   |         |  |   |   | N |
| 49 | 063123 |     |   |   |   | N |   |  |     |   |   |         |  |   |   | N |
| 50 | 063124 |     |   |   |   |   |   |  |     |   |   | R; 2011 |  | R |   | N |
| 51 | 063126 |     |   |   |   |   |   |  | N   |   |   | R; 2008 |  |   |   | N |
| 52 | 063127 |     |   |   |   |   |   |  | N   |   |   |         |  |   |   | N |

|    |        |   |  |   |   |   |   |   |   |   |   |         |   |  |  |  |   |   |
|----|--------|---|--|---|---|---|---|---|---|---|---|---------|---|--|--|--|---|---|
| 53 | 063128 |   |  |   |   |   |   |   |   |   |   |         |   |  |  |  |   | N |
| 54 | 063129 |   |  |   |   |   |   |   |   |   |   | R; 2010 |   |  |  |  |   | N |
| 55 | 063130 |   |  |   |   |   |   |   | N |   |   | R; 2011 |   |  |  |  |   | N |
| 56 | 063131 |   |  |   |   |   |   |   |   |   |   | R; 2010 |   |  |  |  |   | N |
| 57 | 063132 |   |  |   |   |   |   |   |   |   |   | R; 2010 |   |  |  |  |   | N |
| 58 | 063133 |   |  |   |   | N |   |   |   |   |   | R; 2011 |   |  |  |  |   | N |
| 59 | 063134 | N |  |   |   |   |   |   |   |   |   |         |   |  |  |  |   | N |
| 60 | 063135 |   |  |   |   |   |   |   |   |   |   |         |   |  |  |  |   | N |
| 61 | 063136 |   |  |   |   |   |   |   |   |   |   |         |   |  |  |  |   | N |
| 62 | 064259 |   |  |   |   |   |   |   |   |   |   | R; 2007 |   |  |  |  |   |   |
| 63 | 064260 | R |  |   | R | R | R |   | R |   |   |         |   |  |  |  |   |   |
| 64 | 064261 | R |  | R | R | R | R |   | R | R |   |         |   |  |  |  |   |   |
| 65 | 064262 |   |  |   |   |   |   |   |   |   |   | R; 2010 |   |  |  |  |   |   |
| 66 | 064263 | R |  | R | R | R | R |   | R | R |   |         |   |  |  |  |   |   |
| 67 | 064264 |   |  |   |   |   |   |   |   |   |   | R; 2009 |   |  |  |  | R |   |
| 68 | 064265 |   |  |   |   | R |   |   |   |   |   | R; 2009 |   |  |  |  |   |   |
| 69 | 064266 |   |  |   |   |   |   |   |   |   |   | R; 2009 |   |  |  |  |   |   |
| 70 | 064267 | R |  | R | R | R | R | R | R |   |   |         | R |  |  |  |   |   |
| 71 | 064268 | R |  |   | R | R | R |   |   | R |   | R; 2006 |   |  |  |  |   |   |
| 72 | 064287 |   |  |   |   | R |   |   | R |   |   |         |   |  |  |  |   |   |
| 73 | 064269 | R |  |   |   | R | R |   | R |   | R |         |   |  |  |  |   |   |
| 74 | 064270 |   |  |   | R | R |   |   | R |   |   |         |   |  |  |  |   |   |
| 75 | 064271 | R |  |   |   | R |   |   | R |   |   |         |   |  |  |  |   |   |
| 75 | 064272 | R |  |   |   | R |   |   | R |   |   |         |   |  |  |  |   |   |
| 76 | 064273 | R |  |   |   | R | R |   | R |   |   |         |   |  |  |  |   |   |
| 77 | 064275 |   |  |   |   |   |   |   | R |   |   |         |   |  |  |  |   |   |
| 77 | 064276 |   |  |   |   |   |   |   | R |   |   |         |   |  |  |  |   |   |
| 78 | 064277 | R |  |   |   |   |   |   | R | R |   |         |   |  |  |  |   |   |
| 79 | 064278 | R |  | R | R | R | R |   | R |   |   | R; 2006 |   |  |  |  |   |   |

|    |        |   |  |   |   |   |   |  |   |   |  |         |   |  |  |  |
|----|--------|---|--|---|---|---|---|--|---|---|--|---------|---|--|--|--|
| 80 | 064279 | R |  |   |   | R | R |  | R |   |  |         | R |  |  |  |
| 81 | 064281 | R |  | R | R | R | R |  | R | R |  | R; 2006 |   |  |  |  |
| 82 | 064282 |   |  |   |   |   |   |  |   |   |  | R; 2012 |   |  |  |  |
| 83 | 064283 |   |  |   |   |   |   |  |   |   |  | R; 2012 |   |  |  |  |
| 84 | 064284 | R |  |   | R | R | R |  | R |   |  | R; 2012 |   |  |  |  |
| 85 | 064285 | R |  | R | R |   | R |  | R |   |  | R; 2006 |   |  |  |  |
| 86 | 064286 |   |  |   |   |   |   |  | R | R |  | R; 2010 |   |  |  |  |

R: Genotyping analysis performed in Regensburg, Germany (former affiliation of MNP and BL)

N: Genotyping screening performed in Nijmegen, The Netherlands

**Supplementary Table S2. Primers used for mutation hotspot screening and second allele identification**

| <i>Gene</i>   | <b>Exon</b> | <b>Forward primer (5'-3')</b> | <b>Reverse primer (5'-3')</b> |
|---------------|-------------|-------------------------------|-------------------------------|
| <i>AIPL1</i>  | Exon 1      | TCTCAGCCGCCTAAGTGTCTTCC       | TCCCTTTCTTCTCACTCAACATTTAGG   |
|               | Exon 2      | CGGGCCTTGAACAGTGTGTCTAG       | CGCACCAGAACTCGGCCAC           |
|               | Exon 3      | GCCTGGCACACAGTTAACCACAG       | GTCCCTCTCCAGTGTGTCAC          |
|               | Exon 4-5    | AGGGAGATGTGCCACAGGGTC         | TGGCAGGTGTCTCCGTGGC           |
|               | Exon 6      | TGCTCTGAGGCTGGGAAGG           | CACGATCCTGGTCAATCGAACC        |
| <i>CEP290</i> | Exon 1      | AGGCCTTACCTCCTTCT             | GCCCTCAGGCTAAAGAACCT          |
|               | Exon 2-3    | AAAATGTAAGGTGCTAGAAAACCAA     | CCAGGTATTTTACAAAAGATTACCTTA   |
|               | Exon 4      | TTGAGGACTTGAGGTA AAAAGGA      | CCATAATAAACTTTTTCCAAGGTG      |
|               | Exon 5      | GGATCTGCCATATAATACTTTTTGTT    | CCCTTTCGTCACTATTCTCA          |
|               | Exon 6      | TGCTTGTGTTGACTCATTTGAA        | CCAATAATAATAAAAAGCCAGGTAA     |
|               | Exon 7      | CATTTTCTACTTTGTTAGAGAGGATTT   | GAAGACTCCAGTCCTGGTTAAAA       |
|               | Exon 8-9    | AATATGCATCATTTTCCCAA          | AGGAACCATTGCTCTGAATTG         |
|               | Exon 10     | GGACACTTATGGCTGCGTTT          | AAGACAGACAAAAATTCACATCC       |
|               | Exon 11     | TTCCAGGATGACTTCAATGAT         | CCCTAATAAACGTGTTATAAACAG      |
|               | Exon 12     | TGCCAGTAGTTGCTCATACTTTC       | TTCCAAGTGAATAAAAAGTTGATA      |
|               | Exon 13     | AAAAGGCATACTTGTACCCACA        | GAAAATGCATCCATCATTTACAA       |
|               | Exon 14     | TGGGATCACTGATTTGAAGGA         | CAGAATAGTCTGTGAATGGCAAG       |
|               | Exon 15     | GGATTTGGTTTATAAAAAGCACAAATAAA | CACTTCAATCAGGTTAGCTCCA        |
|               | Exon 16-17  | TGACATTTTTGCAGCTTATTTGA       | TTCATATCCAGACAACACTCACTTATCA  |
|               | Exon 18     | TGGAGGGATTTTGGAAACAA          | TTTTCTTTACTCTCTTTGCAATAC      |
|               | Exon 19     | TTTTTGTGTTGACTTTAACATCAG      | CCCTTTTAGGCCATGATTT           |
|               | Exon 20     | TGTGAAAAGATCTGATCATCCA        | TGGCTAAATCTTTCTTGTAGCAAT      |
|               | Exon 21     | TTATCATGCTTGGCAATGAA          | ACATTCTTATGTTTAGCATTTTCTTTT   |
|               | Exon 22     | TGGCAGGGCATTACATATC           | TTGAGAAAAGTACTATCTGCATGCTT    |
|               | Exon 23     | TGTGTTGCTTACAGATTTGGTGA       | TTCAACAATAACAAGAATATACTGCAA   |
|               | Exon 24     | GCTATGATACCTCTTGTGTTGAGAAA    | TCAGAAAAAGCAAAAATAAGAATCAGA   |
|               | Exons 25-26 | TCTTTCTCAAAGTGGCTAGTGC        | CCCCCAAACACAAAAATATTGA        |
|               | Exon 27     | TGGATTGTGAGTTTTAAGGAGATG      | TTGGTGGGGTTAAGTACAGGA         |
|               | Exon 28     | TGGTACAGGCATCACACAGG          | TTTCAGAGATCCAGACAAACCA        |
|               | Exon 29     | GGCCAAGTAAAGAGGATTGC          | GAATTGTATACCTGTAATTGGGTTTC    |
|               | Exon 30     | TGAAAACGAATGGCTTTTTG          | AACATATCCCCTCCCAACA           |
|               | Exon 31     | AACTTTCACTGGAAAAATTTGAAAC     | GCCTGGGAAACAGATCAAGA          |
|               | Exon 32     | TCATCAATGGAGGAATGTTATTTG      | GTCATTTGTGCAATATTCTTGTTT      |
|               | Exon 33     | TTTCTTCAATGTGTTGTGAGGA        | TCTGTGAGTTAACACTCTAGACTATGC   |
|               | Exon 34     | AAGAGGGGTTTAATCTATGTTTATCA    | CATTCTATGCATTGCCCTCA          |
|               | Exon 35     | AAGCATGCAAATAACTGCTGTC        | TCCAATCACATGCAAGTAACAA        |
|               | Exon 36     | GAGGGGACATGCATACCAGT          | TTTTGGCAACAAAAGGGTAA          |
|               | Exon 37     | TTTGATCATTTGAGGAACCAAA        | GCCTGGCATAGCAAACACTT          |
|               | Exon 38     | TGAATTGCAGCAACCACTCT          | AAAAGCAATCTACCACATATTTTTCC    |
|               | Exon 39     | TTTGTGAAATATGTTCCATTA AACTCA  | CACCAACAGTGCATTATAAATTCC      |
|               | Exon 40     | TGGAAAAATATATGTAGTTTGTGGTT    | TTTGAAAGTCAGTTTAAACAAATACCA   |
|               | Exon 41     | AAAATGCAGAAGCAGCTACCA         | AGCCAGGTCATCAAATTAAGG         |
|               | Exon 42     | TCAACCTGTATAGCAAAAATGAACA     | CGAGATCACAGGAAAATCCA          |
|               | Exon 43     | TGGATTTTCTGTGATCTCG           | CCCAAGCTTAAGACAACACACA        |
|               | Exon 44     | CATTTAAAGGAGGCCTTCAGTG        | TGCTTTTGGCCAGATTAAGAA         |
|               | Exon 45     | CCTTTTGACAGTATTTTCTTATCCA     | AAAAGTAAACATAACA ACTAAGGAAGG  |
|               | Exon 46     | TTTTCAATGGCTGTAGCTATGTT       | CAGGGCACTTGTAGAGGCATA         |

|               |             |                             |                             |
|---------------|-------------|-----------------------------|-----------------------------|
|               | Exon 47     | AGAATTGTTTTAAGGATGAATTGAA   | AACCCTTAGCCTTGCCTCTC        |
|               | Exon 48     | AACGTTGGGAACTTCGTTCT        | CTTCCAGTTTTTCCAAGAGGT       |
|               | Exon 49     | GCATTTAGAGCCCCAGGTTA        | CAGGAAGAAACCAGGTTATCCA      |
|               | Exon 50     | AGCTAAAACTTTGACTAGAAGAAACAG | GGTGCCCTTCAGTTAGATGG        |
|               | Exon 51     | ACGCTTTGTTAAAAATGTGTATCTT   | TCTCTAGTTGTAGCAATTCGGAGT    |
|               | Exon 52     | CGATAAAGGCTAGCTTGTCTGA      | GATCAGAAATCTGAGCCAAAAA      |
|               | Exon 53     | CATCCAGTGTTCCTCAGGTC        | TTTTTAGGATACGTAGTTAAAGATGGT |
|               | Exon 54     | TTGCTGTATTTGACCATTCAGG      | TCACCAGAGCTCACTGCCTA        |
| <b>CRBI</b>   | Exon 1      | CGCTCCTCTCTGAGACAGAC        | TTTTATAGAACATGCAACATTATCC   |
|               | Exon 2.1    | AATGAGTTTGGTTGAGGCAG        | ATATCCAGCAGGGCAGATG         |
|               | Exon 2.2    | CAGTGGGACAATCTGTGAAAC       | AATGTCACCTCTGCTTCTGC        |
|               | Exon 3.1    | GCTCTGGTAAACAAAGCATTG       | GAATCCAGGGGCACAGTCG         |
|               | Exon 3.2    | GACGAATGTTGGTCCCAGC         | CAGAGTGGTAAAATAGTTCATG      |
|               | Exon 4      | GAAACAGTATAAAGATATCTGATC    | GCTATAAGCGATATGTGTATTC      |
|               | Exon 5      | AACCTCCTTTTAGGCAAATG        | GGTTAAAGCCATGGTCTGC         |
|               | Exon 6.1    | GAGCTATTCATGCACTTCTGC       | GCCTCTGCAAATATTACCTCC       |
|               | Exon 6.2    | GAAGCTGGAGCTGCTAAGTG        | TTTGCTGTTTCTGCTCTGC         |
|               | Exon 7.1    | TCCATCCCTTCTGTCTTTTG        | TCCTAGGTTTTGTGAAGACTGA      |
|               | Exon 7.2    | GCAATGCTGACTCCAAACTC        | TGGTGGGTCAGTAACATCATC       |
|               | Exon 8      | CAACATTTTTCTATTTAGTTGCC     | CTCAAATGTCGCAACTTAACTG      |
|               | Exon 9.1    | AATGATCATTACTATTAATAACGG    | GTGTTTCGTTGTCCACTTCC        |
|               | Exon 9.2    | TTGCAGTCAGTGAATGATGG        | GGGACAGGAGCAATGATAAG        |
|               | Exon 10     | CTTTTCTTGAATGAGATGAACAAG    | GAACCTTGAGTAATCCCATCATTC    |
|               | Exon 11     | TTCACAACCAATGTATTCAACAG     | TCATACGCAAATGAGGTAAG        |
|               | Exons 12-13 | TTCCTGAGTAGTTCCATTGTCC      | CCCAGTTGCAGATTAACATTG       |
|               | Exon 14     | GCTGTTCCAGAGAGATAAGGC       | CTCAACAACCTGGCTCGTCAT       |
| <b>GUCY2D</b> | Exon 1      | TCAGCTTGGGGAGATTAAGG        | GAGGGCCTCTGACATTTAC         |
|               | Exon 2.1    | TACTCGGGCTTGGAGAAAC         | CTTCTTCGGCGAGCAGC           |
|               | Exon 2.2    | GACCCCATCTTCTCTCGG          | ATGATCACTGCTGCGGAC          |
|               | Exon 3      | AGGTAGGCTCCCTTGACG          | GGCTGTCCTCTCCCCTC           |
|               | Exon 4      | GAATCTGGTCTGTCTGTGGG        | CTCTCTTTCATCACTTTGTGG       |
|               | Exons 5-6   | GAAGAGGCCTCCCCTGG           | GGAAGGAACCAAATTTACGG        |
|               | Exon 7      | TCAACCCAGGACTCTGACAC        | AGGGCCTGAGCATTCTTC          |
|               | Exon 8      | CCCATCGTGGGATTTTAAG         | TACCCAGCTGCAAAGAGAAG        |
|               | Exons 9-10  | TCTTGATTAACAGCCCCTTC        | GAGAAGCCCTTGAAATAATGG       |
|               | Exon 11     | AACCTGGGCTTTCTGGTG          | CTTTTCTAACTGCAGGGTGC        |
|               | Exon 12     | AGAGGCAGCCTTTGTGTTT         | AGCTGTCTCAGGTTGCTGAC        |
|               | Exons 13-14 | GGTTCAGAGTGAACAGCCC         | AGATTGATTGGGCAGGTAGG        |
|               | Exon 15     | CGCTTCGTGTACTCGGG           | CCTCTACAGGAAATCTGGGG        |
|               | Exons 16-17 | GGAGATAATGGGTGCGAAG         | AGGTCAGAAGGGTGAGCTG         |
|               | Exons 18-19 | AGCTACCCTTCTGACCTG          | GACACCTGGCTTGGGTG           |
|               | Exon 20     | CTCTGTAGCTGGCAGAGCAG        | AAAGCAGCACACACCACAAC        |
| <b>LRAT</b>   | Exon 1.2    | TTTGCCCTCCTCTCTCCTCAG       | CTGGCCACTTTGACAATAACG       |
|               | Exon 1.2    | ATGCCCGACATCCTGTTG          | AAGAGAAAAGGTCAGGGATGG       |
|               | Exon 2      | TCTTGGGTTTAGCCACCTTTC       | GTAAGCACTTTGCGTGATTCC       |
| <b>RPE65</b>  | Exon 1      | CAACTTCTGTTCCCCCTCCCTCAG    | CTCTTCAGGAGCCCTTGAATAGC     |
|               | Exon 2      | TCTATCTCTGCGGACTTTGAGCAT    | ATAGGAAGCCAGAGAAGAGAGACT    |
|               | Exon 3      | CCCAAGGCAGGGATAAGAAGCAAT    | AAGCTAGGCCCTACTTTGAGGAGG    |
|               | Exon 4      | ACATGGGCTGTACGGATTGCTCCT    | GAGAGAAAAAGGGCTAATATAAAA    |
|               | Exon 5      | ATGGCTTGAAAATTACTGGACTGA    | TGGTGAATTAATTTAAGTTCCAA     |
|               | Exon 6      | AGGTATAATGTATCTTCTCTCT      | TTATCTTCTCACAATACAGTAAC     |

|         |                          |                          |
|---------|--------------------------|--------------------------|
| Exon 7  | CTGTTCTAAATGCTTTGTATTA   | TAGGCCAAGCCAATCTTTAACTT  |
| Exon 8  | TGTGGCTTGAGAATCAGCCCTTC  | GTGTACATTATTAACACATCTTC  |
| Exon 9  | GTACACTTTTTTCTTTTAAATG   | ACCCCGTAATTTCCAGGAACAATG |
| Exon 10 | AGAATCATCTCTCTAAAATTATTT | CTGAGAGAGATGAAACATTCTGGT |
| Exon 11 | GAATTCCTTCTGCTCACTGAGGT  | GAGCACATGCTTAGGAAACTCTT  |
| Exon 12 | ACTTCACACGGGAGTGAACAAATG | GTCAATATGCTTTACTTGACTAGC |
| Exon 13 | GCTAGTCAAGTAAAGCATATTGAC | CATACAGAGCTGCAGTAAGAAGAG |
| Exon 14 | TGACTCAATCTATAGCTTCGGC   | GATTGCAGACCTGAAGCTGATTTT |

### ARMS-primers used for screening *CEP290* c.2991+1655A>G mutation

| ARMS Primer                                           | Sequence (5'-3')               |
|-------------------------------------------------------|--------------------------------|
| ARMS <i>CEP290</i> c.2991+1655A>G wild type - forward | ACCGCACCTGGCCCCAGTTGTAATTGTGGA |
| ARMS <i>CEP290</i> c.2991+1655A>G mutant - forward    | ACCGCACCTGGCCCCAGTTGTAATTGTGGG |
| ARMS <i>CEP290</i> c.2991+1655A>G reverse             | AGTAAGGAGGATGTAAGACTGGAGATAGAG |

**Supplementary Table S3. Estimated carrier frequencies of causative variants in LCA genes**

| Gene name     | %    | LCA              |              | arRP           |              |
|---------------|------|------------------|--------------|----------------|--------------|
|               |      | q <sup>2</sup>   | 2pq          | q <sup>2</sup> | 2pq          |
| <i>AIPL1</i>  | 5.3  | 1/943396         | 1/486        |                |              |
| <i>CEP290</i> | 15   | 1/333333         | 1/289        |                |              |
| <i>CRB1</i>   | 9.9  | 1/5050501        | 1/356        | 1/175000       | 1/210        |
| <i>GUCY2D</i> | 11.7 | 1/427350         | 1/327        |                |              |
| <i>LRAT</i>   | 0.5  | 1/10000000       | 1/1582       | 1/233333       | 1/242        |
| <i>RPE65</i>  | 6    | 1/833333         | 1/457        | 1/175000       | 1/242        |
|               |      | <b>~1/103306</b> | <b>~1/70</b> | <b>~1/77</b>   | <b>~1/37</b> |

The Hardy-Weinberg equilibrium ( $p^2 + 2pq + q^2 = 1$ ) was used to estimate the carrier frequencies for autosomal recessive traits. p, frequency of the wild type allele; q, frequency of the recessive mutant allele; q<sup>2</sup>, prevalence of a homozygous recessive allele; 2pq, carrier frequency. Percentage of patients affected by mutations in the gene was calculated by assuming a prevalence LCA of 1:50,000.



**Supplementary Table S4. Allele frequencies of identified variants in this study**

| Gene                 | Nucleotide change          | Amino acid change     | Number of alleles | Reference    |
|----------------------|----------------------------|-----------------------|-------------------|--------------|
| <i>AIPL1</i>         | <b>c.815G&gt;C</b>         | <b>p.(R272P)</b>      | <b>1</b>          | <b>novel</b> |
| <i>AIPL1</i>         | c.834G>A                   | p.(W278*)             | 7                 | 1            |
| <i>CEP290</i>        | c.1219_1220delAT           | p.(M407Efs*14)        | 1                 | 2            |
| <i>CEP290</i>        | <b>c.2119_2123dupCAGCT</b> | <b>p.(Q709Sfs*11)</b> | <b>2</b>          | <b>novel</b> |
| <i>CEP290</i>        | c.2991+1655A>G             | p.(C998*)/p.=#        | 8                 | 3            |
| <i>CEP290</i>        | <b>c.5364+2T&gt;G</b>      | <b>p.(?)</b>          | <b>2</b>          | <b>novel</b> |
| <i>CRB1</i>          | c.584G>T                   | p.(C195F)             | 1                 | 4            |
| <i>CRB1</i>          | c.613_619delATAGGAA        | p.(I205Dfs*13)        | 3                 | 5            |
| <i>CRB1</i>          | c.2290C>T                  | p.(R764C)             | 1                 | 6            |
| <i>CRB1</i>          | c.2401A>T                  | p.(K801*)             | 2                 | 6            |
| <i>CRB1</i>          | <b>c.2549G&gt;T</b>        | <b>p.(G850V)</b>      | <b>1</b>          | <b>novel</b> |
| <i>CRB1</i>          | c.2843G>A                  | p.(C948Y)             | 1                 | 6            |
| <i>CRB1</i>          | <b>c.4006G&gt;A</b>        | <b>p.(V1336I)</b>     | <b>1</b>          | <b>novel</b> |
| <i>CRB1</i>          | c.4121_4130del10           | p.(A1374Nfs*20)       | 2                 | 6            |
| <i>GUCY2D</i>        | c.779T>C                   | p.(L260P)             | 2                 | 7            |
| <b><i>GUCY2D</i></b> | <b>(c.380C&gt;T)</b>       | <b>p.(P127L)</b>      | <b>1</b>          | <b>novel</b> |
| <i>GUCY2D</i>        | <b>c.1561C&gt;T</b>        | <b>p.(R521*)</b>      | <b>2</b>          | <b>novel</b> |
| <i>GUCY2D</i>        | c.1694T>C                  | p.(F565S)             | 1                 | 8            |
| <i>GUCY2D</i>        | <b>c.1877T&gt;C</b>        | <b>p.(S626F)</b>      | <b>2</b>          | <b>novel</b> |
| <i>GUCY2D</i>        | c.1957G>A                  | p.(G653R)             | 1                 | 7            |
| <i>GUCY2D</i>        | c.2234delC                 | p.(P745Lfs*39)        | 1                 | 7            |
| <i>GUCY2D</i>        | <b>c.2135_2136delinsTC</b> | <b>p.(E712V)</b>      | <b>1</b>          | <b>novel</b> |
| <i>GUCY2D</i>        | c.2302C>T                  | p.(R768W)             | 5                 | 9            |
| <i>GUCY2D</i>        | c.2513G>C                  | p.(R838P)             | 1                 | 10           |
| <i>GUCY2D</i>        | c.2849C>T                  | p.(A950V)             | 2                 | 7            |
| <i>GUCY2D</i>        | <b>c.3043+5G&gt;A</b>      | <b>p.(?)</b>          | <b>1</b>          | <b>novel</b> |
| <i>RDH12</i>         | c.2T>C                     | p.(M1T)               | 1                 | 11           |
| <i>RDH12</i>         | c.379G>T                   | p.(G127*)             | 2                 | 12           |
| <i>RDH12</i>         | c.582C>G                   | p.(Y194*)             | 1                 | 11           |
| <i>RPE65</i>         | c.11+5G>A                  | p.(?)                 | 4                 | 13           |

|                |                       |                      |          |              |
|----------------|-----------------------|----------------------|----------|--------------|
| <i>RPE65</i>   | <b>c.94G&gt;T</b>     | <b>p.(G32C)</b>      | <b>1</b> | <b>novel</b> |
| <i>RPE65</i>   | <b>c.130C&gt;T</b>    | <b>p.(R44*)</b>      | <b>4</b> | <b>novel</b> |
| <i>RPE65</i>   | c.272G>A              | p.(R91Q)             | 1        | 14           |
| <i>RPE65</i>   | c.271C>T              | p.(R91W)             | 2        | 15           |
| <i>RPE65</i>   | <b>c.329A&gt;G</b>    | <b>p.(D110G)</b>     | <b>7</b> | <b>novel</b> |
| <i>RPE65</i>   | <b>495+1dup</b>       | <b>p.(?)</b>         | <b>2</b> | <b>novel</b> |
| <i>RPE65</i>   | c.769T>G              | p.(Y239D)            | 1        | 16           |
| <i>RPE65</i>   | c.963T>G              | p.(N321K)            | 2        | 17           |
| <i>RPE65</i>   | <b>c.1088C&gt;G</b>   | <b>p.(P363R)</b>     | <b>1</b> | <b>novel</b> |
| <i>RPE65</i>   | c.1102T>C             | p.(Y368H)            | 4        | 18           |
| <i>RPE65</i>   | c.1328T>C             | p.(V443A)            | 1        | 19           |
| <i>RPE65</i>   | c.1374G>A             | p.(W458*)            | 1        | 7            |
| <i>RPE65</i>   | c.1543C>T             | p.(R515W)            | 1        | 20           |
| <i>RPGRIPI</i> | <b>c.930+3A&gt;G</b>  | <b>p.(?)</b>         | <b>1</b> | <b>novel</b> |
| <i>RPGRIPI</i> | <b>c.3618-5del</b>    | <b>p.(?)</b>         | <b>1</b> | <b>novel</b> |
| <i>TULP1</i>   | <b>c.1495_1496dup</b> | <b>p.(D500Vfs*4)</b> | <b>1</b> | <b>novel</b> |

**Supplementary Table S5. RPE65 variants registered in LOVD**

| Exon/Intron | cDNA Change         | Protein Change     | Allele Count | Coding Effect     | Classification                  | Reference               |
|-------------|---------------------|--------------------|--------------|-------------------|---------------------------------|-------------------------|
| 1           | c.-4G>A             | p.(?)              | 1            | Unknown           | Variant of unknown significance | 21                      |
| 1           | c.2T>C              | p.(Met1?)          | 5            | Start loss        | Affects function                | 15,22                   |
| 2           | c.16G>T             | p.(Glu6*)          | 2            | Nonsense          | Affects function                | 23,24                   |
| 2           | c.57_58del          | p.(Glu20Glyfs*31)  | 4            | Frameshift        | Affects function                | 21,25                   |
| 2           | c.65T>C             | p.(Leu22Pro)       | 2            | Missense          | Variant of unknown significance | 26,27                   |
| 2           | c.74C>T             | p.(Pro25Leu)       | 2            | Missense          | Affects function                | 28                      |
| 2           | c.89dup             | p.(Thr31Asnfs*21)  | 1            | Frameshift        | Affects function                | 13                      |
| 2           | c.89T>C             | p.(Val30Ala)       | 1            | Missense          | Variant of unknown significance | 29                      |
| 2           | c.90_91insT         | p.(Thr31Tyrfs*21)  | 1            | Frameshift        | Affects function                | 22                      |
| 3           | c.95G>T             | p.(Gly32Val)       | 1            | Missense          | Affects function                | 30                      |
| 3           | c.97_116del         | p.(Ile34Glnfs*11)  | 2            | Frameshift        | Affects function                | 31                      |
| 3           | c.106_114del        | p.(Leu36_Leu38del) | 2            | In-frame deletion | Affects function                | 30                      |
| 3           | c.118G>A            | p.(Gly40Ser)       | 23           | Missense          | Affects function                | 15,19,23,24,31-40       |
| 3           | c.131G>A            | p.(Arg44Gln)       | 29           | Missense          | Affects function                | 14,19,31,32,34,37,39-43 |
| 3           | c.133T>C            | p.(Cys45Arg)       | 1            | Missense          | Variant of unknown significance | 38                      |
| 3           | c.138del            | p.(Pro47Glnfs*47)  | 4            | Frameshift        | Affects function                | 9,19,33,36              |
| 3           | c.144_145insT       | p.(Leu49Serfs*3)   | 1            | Frameshift        | Affects function                | 18                      |
| 3           | c.177C>G            | p.(His59Gln)       | 1            | Missense          | Affects function                | 44                      |
| 3           | c.179T>C            | p.(Leu60Pro)       | 10           | Missense          | Affects function                | 24,45                   |
| 3           | c.183dup            | p.(Asp62*)         | 1            | Frameshift        | Affects function                | 44                      |
| 3           | c.190C>T            | p.(Gln64*)         | 4            | Nonsense          | Affects function                | 43,46                   |
| 3           | c.200T>G            | p.(Leu67Arg)       | 7            | Missense          | Affects function                | 25,47-49                |
| 3           | c.201_202delGCinsTT | p.(His68Tyr)       | 1            | Missense          | Affects function                | 27                      |
| 3           | c.208T>G            | p.(Phe70Val)       | 2            | Missense          | Affects function                | 26,50                   |
| 3           | c.219dup            | p.(Glu74Argfs*14)  | 6            | Frameshift        | Affects function                | 51                      |
| 3           | c.235T>C            | p.(Tyr79His)       | 1            | Missense          | Affects function                | 22                      |
| 3           | c.289dup            | p.(Arg97Lysfs*34)  | 3            | Frameshift        | Affects function                | 19,52                   |
| 4           | c.249C>G            | p.(Phe83Leu)       | 2            | Missense          | Affects function                | 25                      |
| 4           | c.253C>T            | p.(Arg85Cys)       | 1            | Missense          | Variant of unknown significance | 19                      |

|   |              |                      |     |                   |                                 |                                                 |
|---|--------------|----------------------|-----|-------------------|---------------------------------|-------------------------------------------------|
| 4 | c.254G>A     | p.(Arg85His)         | 1   | Missense          | Affects function                | 22                                              |
| 4 | c.271C>T     | p.(Arg91Trp)         | 100 | Missense          | Affects function                | 14,15,18,19,22,23,31,32,34-36,39,40,42,50,53-58 |
| 4 | c.272G>A     | p.(Arg91Gln)         | 17  | Missense          | Variant of unknown significance | 19,22,25,31,35,37,39,40                         |
| 4 | c.272G>C     | p.(Arg91Pro)         | 1   | Missense          | Affects function                | 26                                              |
| 4 | c.289_309del | p.(Arg97_Phe103del)  | 6   | In-frame deletion | Affects function                | 9,14,35                                         |
| 4 | c.292_311del | p.(Ile98Hisfs*26)    | 20  | Frameshift        | Affects function                | 22,32,37 19,39,40,59                            |
| 4 | c.295G>A     | p.(Val99Ile)         | 2   | Missense          | Probably no functional effect   | 60                                              |
| 4 | c.297_308del | p.(Ile100_Phe103del) | 1   | In-frame deletion | Affects function                | 31                                              |
| 4 | c.297del     | p.(Ile100*)          | 1   | Nonsense          | Affects function                | 14                                              |
| 4 | c.302C>T     | p.(Thr101Ile)        | 3   | Missense          | Affects function                | 19,34                                           |
| 4 | c.304G>A     | p.(Glu102Lys)        | 3   | Missense          | Affects function                | 15,26                                           |
| 4 | c.304G>T     | p.(Glu102*)          | 21  | Nonsense          | Affects function                | 7,19,21,22,33,36,61                             |
| 4 | c.310G>C     | p.(Gly104Arg)        | 2   | Missense          | Affects function                | 62                                              |
| 4 | c.311G>A     | p.(Gly104Asp)        | 1   | Missense          | Affects function                | 31                                              |
| 4 | c.329A>T     | p.(Asp110Val)        | 1   | Missense          | Affects function                | 24                                              |
| 4 | c.344T>C     | p.(p.Ile115Thr)      | 1   | Missense          | Affects function                | 63                                              |
| 5 | c.354G>T     | p.(Arg118Ser)        | 3   | Missense          | Affects function                | 19,64                                           |
| 5 | c.361del     | p.(Ser121Leufs*6)    | 12  | Frameshift        | Affects function                | 29,41,45,65                                     |
| 5 | c.361dup     | p.(Ser121Phefs*10)   | 2   | Frameshift        | Affects function                | 65                                              |
| 5 | c.370C>T     | p.(Arg124*)          | 11  | Nonsense          | Affects function                | 15,19,22,23,26,33,36,41,66                      |
| 5 | c.382G>C     | p.(Val128Leu)        | 1   | Missense          | Probably no functional effect   | 22                                              |
| 5 | c.394G>A     | p.(Ala132Thr)        | 13  | Missense          | Probably no functional effect   | 15,19,22,55,65,67                               |
| 5 | c.395C>A     | p.(Ala132Asp)        | 2   | Missense          | Affects function                | 31                                              |
| 5 | c.406G>T     | p.(Val136Phe)        | 1   | Missense          | Probably no functional effect   | 64                                              |
| 5 | c.427T>G     | p.(Tyr143Asp)        | 2   | Missense          | Variant of unknown significance | 68                                              |
| 5 | c.430T>C     | p.(Tyr144His)        | 1   | Missense          | Affects function                | 47                                              |
| 5 | c.430T>G     | p.(Tyr144Asp)        | 13  | Missense          | Affects function                | 14,19,26,31,37,39,69                            |
| 5 | c.434C>A     | p.(Ala145Asp)        | 2   | Missense          | Affects function                | 49                                              |
| 5 | c.440_441del | p.(Thr147Argfs*9)    | 2   | Frameshift        | Affects function                | 26                                              |
| 5 | c.444G>T     | p.(Glu148Asp)        | 1   | Missense          | Variant of unknown significance | 43                                              |
| 5 | c.484A>C     | p.(Thr162Pro)        | 1   | Missense          | Affects function                | 19                                              |

|   |               |                    |    |            |                                 |                            |
|---|---------------|--------------------|----|------------|---------------------------------|----------------------------|
| 6 | c.499G>T      | p.(Asp167Tyr)      | 6  | Missense   | Affects function                | 19,22-24,26,51             |
| 6 | c.500del      | p.(Asp167Valfs*41) | 4  | Frameshift | Affects function                | 31                         |
| 6 | c.540C>A      | p.(His180Gln)      | 1  | Missense   | Affects function                | 53                         |
| 6 | c.542C>T      | p.(Pro181Leu)      | 2  | Missense   | Affects function                | 41                         |
| 6 | c.544C>A      | p.(His182Asn)      | 1  | Missense   | Affects function                | 43                         |
| 6 | c.544C>T      | p.(His182Tyr)      | 9  | Missense   | Affects function                | 15,19,31-33,36,37          |
| 6 | c.545A>G      | p.(His182Arg)      | 8  | Missense   | Affects function                | 14,31,39,55                |
| 6 | c.565G>A      | p.(Val189Ile)      | 1  | Missense   | Variant of unknown significance | 55                         |
| 6 | c.615_616del  | p.(Ile206Cysfs*27) | 2  | Frameshift | Affects function                | 22,43                      |
| 7 | c.668_669del  | p.(Ser223*)        | 1  | Nonsense   | Affects function                | 22                         |
| 7 | c.700C>T      | p.(Arg234*)        | 11 | Nonsense   | Affects function                | 22,26,41,43,46,51,70       |
| 7 | c.715T>G      | p.(Tyr239Asp)      | 12 | Missense   | Affects function                | 19,31-34,36,50,71          |
| 8 | c.731G>T      | p.(Gly244Val)      | 2  | Missense   | Affects function                | 55                         |
| 8 | c.746A>G      | p.(Tyr249Cys)      | 2  | Missense   | Affects function                | 24                         |
| 8 | c.751G>T      | p.(Val251Phe)      | 2  | Missense   | Affects function                | 72                         |
| 8 | c.778_785del  | p.(Asn260Glnfs*18) | 4  | Frameshift | Affects function                | 13,22,51                   |
| 9 | c.859G>T      | p.(Val287Phe)      | 14 | Missense   | Affects function                | 9,19,31,32,39,40,55        |
| 9 | c.864G>T      | p.(Trp288Cys)      | 1  | Missense   | Affects function                | 55                         |
| 9 | c.868C>T      | p.(His290Tyr)      | 3  | Missense   | Affects function                | 65                         |
| 9 | c.871A>G      | p.(Ile291Val)      | 1  | Missense   | Probably no functional effect   | 55                         |
| 9 | c.881A>C      | p.(Lys294Thr)      | 4  | Missense   | Probably no functional effect   | 22,34,73                   |
| 9 | c.886dup      | p.(Arg296Lysfs*7)  | 1  | Frameshift | Affects function                | 41                         |
| 9 | c.893del      | p.(Lys298Serfs*27) | 7  | Frameshift | Affects function                | 9,19,24,37,39,74           |
| 9 | c.907A>T      | p.(Lys303*)        | 5  | Nonsense   | Affects function                | 14,19,31,39,75             |
| 9 | c.912C>A      | p.(Tyr304*)        | 1  | Nonsense   | Affects function                | 76                         |
| 9 | c.917C>T      | p.(Thr306Ile)      | 1  | Missense   | Variant of unknown significance | 76                         |
| 9 | c.938A>G      | p.(His313Arg)      | 1  | Missense   | Affects function                | 26                         |
| 9 | c.939T>A      | p.(His313Gln)      | 2  | Missense   | Affects function                | 65                         |
| 9 | c.952T>A      | p.(Tyr318Asn)      | 3  | Missense   | Affects function                | 19,34                      |
| 9 | c.962dup      | p.(Asn321Lysfs*15) | 1  | Frameshift | Affects function                | 15                         |
| 9 | c.963_964insA | p.(Gly322Argfs*14) | 1  | Frameshift | Affects function                | 36                         |
| 9 | c.963T>G      | p.(Asn321Lys)      | 12 | Missense   | Probably no functional effect   | 22,24,29,34,37,52,55,77,78 |

|    |                 |                    |    |                      |                                 |                                        |
|----|-----------------|--------------------|----|----------------------|---------------------------------|----------------------------------------|
| 9  | c.989G>A        | p.(Cys330Tyr)      | 8  | Missense             | Variant of unknown significance | 43,46,79                               |
| 9  | c.991_993dup    | p.(Trp331dup)      | 5  | In-frame duplication | Affects function                | 41,80                                  |
| 9  | c.993G>A        | p.(Trp331*)        | 2  | Nonsense             | Affects function                | 25                                     |
| 9  | c.997G>C        | p.(Gly333Arg)      | 1  | Missense             | Affects function                | 60                                     |
| 10 | c.1022T>C       | p.(Leu341Ser)      | 29 | Missense             | Affects function                | 14,15,19,25,31,32,39-41,64,81          |
| 10 | c.1028T>A       | p.(Leu343*)        | 1  | Nonsense             | Affects function                | 14                                     |
| 10 | c.1059dup       | p.(Lys354Glufs*11) | 7  | Frameshift           | Affects function                | 32,33,35,39,40,60                      |
| 10 | c.1067del       | p.(Asn356Metfs*17) | 13 | Frameshift           | Affects function                | 18,19,22,43,46,51,70,82                |
| 10 | c.1067dup       | p.(Asn356Lysfs*9)  | 7  | Frameshift           | Affects function                | 19,31,32,36,53                         |
| 10 | c.1069_1070insT | p.(Ala357Valfs*8)  | 2  | Frameshift           | Affects function                | 9                                      |
| 10 | c.1078G>C       | p.(Ala360Pro)      | 3  | Missense             | Variant of unknown significance | 29,34                                  |
| 10 | c.1087C>A       | p.(Pro363Thr)      | 16 | Missense             | Affects function                | 13,22,24,43,46,69                      |
| 10 | c.1102T>C       | p.(Tyr368His)      | 69 | Missense             | Affects function                | 14,18,19,22-24,31,32,39,42,50,68,83-85 |
| 10 | c.1103A>G       | p.(Tyr368Cys)      | 4  | Missense             | Affects function                | 25,48                                  |
| 11 | c.1178C>A       | p.(Ala393Glu)      | 7  | Missense             | Affects function                | 9,19,33,36                             |
| 11 | c.1205G>A       | p.(Trp402*)        | 2  | Nonsense             | Affects function                | 19,81                                  |
| 11 | c.1207_1210dup  | p.(Glu404Alafs*4)  | 4  | Frameshift           | Affects function                | 15                                     |
| 11 | c.1220T>C       | p.(Val407Ala)      | 1  | Missense             | Variant of unknown significance | 15                                     |
| 11 | c.1223T>C       | p.(Leu408Pro)      | 10 | Missense             | Affects function                | 19,31,34,39,40                         |
| 12 | c.1244_1338del  | p.(Phe416Leufs*2)  | 1  | Frameshift           | Affects function                | 34                                     |
| 12 | c.1249G>C       | p.(Glu417Gln)      | 12 | Missense             | Affects function                | 14,31,32,37,39,42                      |
| 12 | c.1292A>G       | p.(Tyr431Cys)      | 5  | Missense             | Affects function                | 14,19,31,75                            |
| 12 | c.1301C>T       | p.(Ala434Val)      | 11 | Missense             | Probably no functional effect   | 9,24,34,43,46,55                       |
| 12 | c.1304A>G       | p.(Tyr435Cys)      | 1  | Missense             | Affects function                | 30                                     |
| 12 | c.1307G>T       | p.(Gly436Val)      | 2  | Missense             | Affects function                | 22,24                                  |
| 12 | c.1328T>C       | p.(Val443Ala)      | 3  | Missense             | Affects function                | 19,64                                  |
| 12 | c.1336dup       | p.(Arg446Lysfs*4)  | 1  | Frameshift           | Affects function                | 29                                     |
| 13 | c.1355T>G       | p.(Val452Gly)      | 1  | Missense             | Affects function                | 15                                     |
| 13 | c.1370C>A       | p.(Thr457Asn)      | 2  | Missense             | Probably no functional effect   | 18,22                                  |
| 13 | c.1379G>A       | p.(Trp460*)        | 1  | Nonsense             | Affects function                | 31                                     |
| 13 | c.1380G>A       | p.(Trp460*)        | 1  | Nonsense             | Affects function                | 19                                     |

|                               |                |                    |     |                     |                               |                                                            |
|-------------------------------|----------------|--------------------|-----|---------------------|-------------------------------|------------------------------------------------------------|
| 13                            | c.1380G>C      | p.(Trp460Cys)      | 1   | Missense            | Affects function              | 64                                                         |
| 13                            | c.1384G>T      | p.(Glu462*)        | 4   | Nonsense            | Affects function              | 9,19                                                       |
| 13                            | c.1409C>T      | p.(Pro470Leu)      | 2   | Missense            | Affects function              | 17                                                         |
| 13                            | c.1418T>A      | p.(Val473Asp)      | 5   | Missense            | Affects function              | 15,36,43,46                                                |
| 13                            | c.1430A>G      | p.(Asp477Gly)      | 23  | Missense            | Affects function              | 86                                                         |
| 14                            | c.1451G>A      | p.(Gly484Asp)      | 1   | Missense            | Affects function              | 64                                                         |
| 14                            | c.1459_1460del | p.(Leu487Glufs*25) | 2   | Frameshift          | Affects function              | 62                                                         |
| 14                            | c.1501_1505del | p.(Tyr501Profs*10) | 5   | Frameshift          | Affects function              | 19,39                                                      |
| 14                            | c.1543C>T      | p.(Arg515Trp)      | 8   | Missense            | Affects function              | 19,20,38,44                                                |
| 14                            | c.1583G>T      | p.(Gly528Val)      | 1   | Missense            | Affects function              | 22                                                         |
| 14                            | c.1590C>A      | p.(Phe530Leu)      | 1   | Missense            | Affects function              | 87                                                         |
| 14                            | c.1590del      | p.(Phe530Leufs*40) | 7   | Frameshift          | Affects function              | 23,41,66                                                   |
| 14                            | c.1597T>A      | p.(Ser533Thr)      | 2   | Missense            | Probably no functional effect | 19,29                                                      |
| 1i                            | c.11+1G>T      | p.(?)              | 2   | Splice site variant | Affects function              | 32                                                         |
| 1i                            | c.11+5G>A      | p.(?)              | 62  | Splice site variant | Affects function              | 9,13,14,18,19,22-24,31-33,36,37,39,41,43,46,63,64,83-85,88 |
| 1i                            | c.12-2A>G      | p.(?)              | 1   | Splice site variant | Affects function              | 23                                                         |
| 2i                            | c.94+10A>G     | p.(?)              | 1   | Splice site variant | Probably no functional effect | 24                                                         |
| 2i                            | c.95-1G>A      | p.(?)              | 8   | Splice site variant | Affects function              | 45                                                         |
| 2i                            | c.95-2A>C      | p.(?)              | 4   | Splice site variant | Affects function              | 31,40                                                      |
| 2i                            | c.95-2A>T      | p.(?)              | 6   | Splice site variant | Affects function              | 26,32,43                                                   |
| 2i                            | c.95-3C>G      | p.(?)              | 6   | Splice site variant | Affects function              | 89                                                         |
| 6i                            | c.643+1G>C     | p.(?)              | 10  | Splice site variant | Affects function              | 54                                                         |
| 6i                            | c.643+4A>G     | p.(?)              | 1   | Splice site variant | Affects function              | 22                                                         |
| 6i                            | c.644-2A>T     | p.(?)              | 3   | Splice site variant | Affects function              | 15,43                                                      |
| 7i                            | c.725+4A>G     | p.(?)              | 5   | Splice site variant | Affects function              | 19,31,37,39                                                |
| 7i                            | c.726-3C>A     | p.(?)              | 1   | Splice site variant | Affects function              | 90                                                         |
| 7i                            | c.858+1G>A     | p.(?)              | 4   | Splice site variant | Affects function              | 43,46                                                      |
| 8i                            | c.858+1G>T     | p.(?)              | 10  | Splice site variant | Affects function              | 13,56                                                      |
| 11i                           | c.1243+2T>A    | p.(?)              | 1   | Splice site variant | Affects function              | 87                                                         |
| Total alleles                 |                |                    | 914 |                     |                               |                                                            |
| Probably no functional effect |                |                    | 50  |                     |                               |                                                            |

|                             |     |
|-----------------------------|-----|
| Heterozygous Cases          | 140 |
| Dominant Cases              | 23  |
| Homozygous Cases            | 231 |
| Compound Heterozygous Cases | 144 |
| Uniparental Isodisomy       | 1   |
| Total Cases                 | 539 |

**Supplementary Table S6. In silico analysis *RPE65* missense variants**

| Exon | cDNA Change         | Protein Change | AC  | PhyloP     | PolyPhen-2 score | PolyPhen-2 Prediction         | SIFT Score | SIFT Prediction | ExAC (AC, TA, HZ, AF)    | Classification                    | References                              |
|------|---------------------|----------------|-----|------------|------------------|-------------------------------|------------|-----------------|--------------------------|-----------------------------------|-----------------------------------------|
| 2    | c.65T>C             | p.(Leu22Pro)   | 2   | 4.48       | 0.089            | Probably no functional effect | 0.23       | TOLERATED       | 6, 118912, 0, 5.046e-05  | Variation of unknown significance | 7,8                                     |
| 2    | c.74C>T             | p.(Pro25Leu)   | 2   | 5.33       | 0.988            | Probably damaging             | 0.05       | DAMAGING        | 3, 118980, 0, 2.521e-05  | Affects function                  | 9                                       |
| 2    | c.89T>C             | p.(Val30Ala)   | 1   | 1.06       | 0.655            | Possibly damaging             | 0.42       | TOLERATED       | -                        | Variation of unknown significance | 11                                      |
| 3    | c.95G>T             | p.(Gly32Val)   | 1   | 5.77       | 1                | Probably damaging             | 0          | DAMAGING        | -                        | Affects function                  | 12                                      |
| 3    | c.118G>A            | p.(Gly40Ser)   | 23  | 5.77       | 1                | Probably damaging             | 0          | DAMAGING        | -                        | Affects function                  | 3-5,13-23                               |
| 3    | c.131G>A            | p.(Arg44Gln)   | 29  | 5.77       | 1                | Probably damaging             | 0          | DAMAGING        | 7, 121406, 0, 5.766e-05  | Affects function                  | 13,14,16,19,21-27                       |
| 3    | c.133T>C            | p.(Cys45Arg)   | 1   | 1.06       | 0.536            | Possibly damaging             | 0.26       | TOLERATED       | -                        | Variation of unknown significance | 20                                      |
| 3    | c.177C>G            | p.(His59Gln)   | 1   | 1.58       | 1                | Probably damaging             | 0          | DAMAGING        | -                        | Affects function                  | 30                                      |
| 3    | c.179T>C            | p.(Leu60Pro)   | 10  | 4.73       | 1                | Probably damaging             | 0.26       | TOLERATED       | -                        | Affects function                  | 5,31                                    |
| 3    | c.200T>G            | p.(Leu67Arg)   | 7   | 4.73       | -                | -                             | 0          | DAMAGING        | -                        | Affects function                  | 6,33-35                                 |
| 3    | c.201_202delGCinsTT | p.(His68Tyr)   | 1   | -0.36/5.77 | 1                | Probably damaging             | 0.28       | TOLERATED       | -                        | Affects function                  | 8                                       |
| 3    | c.208T>G            | p.(Phe70Val)   | 2   | 4.73       | 1                | Probably damaging             | 0.22       | TOLERATED       | -                        | Affects function                  | 7,36                                    |
| 3    | c.235T>C            | p.(Tyr79His)   | 1   | 4.73       | 0.97             | Probably damaging             | 0.07       | TOLERATED       | -                        | Affects function                  | 2                                       |
| 4    | c.249C>G            | p.(Phe83Leu)   | 2   | 0.77       | 0.776            | Possibly damaging             | 0.04       | DAMAGING        | -                        | Affects function                  | 6                                       |
| 4    | c.253C>T            | p.(Arg85Cys)   | 1   | 2.63       | 1                | Probably damaging             | 0.06       | TOLERATED       | 14, 120410, 0, 0.0001163 | Variation of unknown significance | 21                                      |
| 4    | c.254G>A            | p.(Arg85His)   | 1   | 3.19       | 0.887            | Possibly damaging             | 0.04       | DAMAGING        | 2, 120484, 0, 1.66e-05   | Affects function                  | 2                                       |
| 4    | c.271C>T            | p.(Arg91Trp)   | 100 | 1.09       | 0.999            | Probably damaging             | 0.01       | DAMAGING        | 10, 120738, 0, 8.282e-05 | Affects function                  | 2-4,13,14,16-18,21-23,25,26,29,36,39-44 |
| 4    | c.272G>A            | p.(Arg91Gln)   | 17  | 5.86       | 0.283            | Probably no functional effect | 0.52       | TOLERATED       | 4, 120746, 0, 3.313e-05  | Variation of unknown significance | 2,6,13,17,19,21-23                      |
| 4    | c.272G>C            | p.(Arg91Pro)   | 1   | 5.86       | 0.926            | Possibly damaging             | 0.2        | TOLERATED       | -                        | Affects function                  | 7                                       |



|   |          |                 |    |      |       |                               |      |           |                          |                                 |                     |
|---|----------|-----------------|----|------|-------|-------------------------------|------|-----------|--------------------------|---------------------------------|---------------------|
| 4 | c.295G>A | p.(Val99Ile)    | 2  | 5.77 | 0.077 | Probably no functional effect | 0.12 | TOLERATED | 36, 120964, 1, 0.0002976 | Probably no functional effect   | 46                  |
| 4 | c.302C>T | p.(Thr101Ile)   | 3  | 5.77 | 0.982 | Probably damaging             | 0.25 | TOLERATED | -                        | Affects function                | 16,21               |
| 4 | c.304G>A | p.(Glu102Lys)   | 3  | 5.77 | 1     | Probably damaging             | 0.19 | TOLERATED | -                        | Affects function                | 3,7                 |
| 4 | c.310G>C | p.(Gly104Arg)   | 2  | 0.86 | 1     | Probably damaging             | 0.01 | DAMAGING  | -                        | Affects function                | 49                  |
| 4 | c.311G>A | p.(Gly104Asp)   | 1  | 5.77 | 1     | Probably damaging             | 0.01 | DAMAGING  | -                        | Affects function                | 13                  |
| 4 | c.329A>T | p.(Asp110Val)   | 1  | 4.73 | 0.991 | Probably damaging             | 0    | DAMAGING  | -                        | Affects function                | 5                   |
| 4 | c.344T>C | p.(p.Ile115Thr) | 1  | 4.73 | 0.989 | Probably damaging             | 0.07 | TOLERATED | -                        | Affects function                | 50                  |
| 5 | c.354G>T | p.(Arg118Ser)   | 3  | 1.17 | 0.969 | Probably damaging             | 0.04 | DAMAGING  | -                        | Affects function                | 21,51               |
| 5 | c.382G>C | p.(Val128Leu)   | 1  | 1.25 | 0     | Probably no functional effect | 1    | TOLERATED | -                        | Probably no functional effect   | 2                   |
| 5 | c.394G>A | p.(Ala132Thr)   | 13 | 3.6  | 0.012 | Probably no functional effect | 0.24 | TOLERATED | 348, 121220, 4, 0.002871 | Probably no functional effect   | 2,3,21,41,52,54     |
| 5 | c.395C>A | p.(Ala132Asp)   | 2  | 3.84 | 0.159 | Probably no functional effect | 0.03 | DAMAGING  | -                        | Affects function                | 13                  |
| 5 | c.406G>T | p.(Val136Phe)   | 1  | 0.21 | 0     | Probably no functional effect | 0.19 | TOLERATED | 1, 121256, 0, 8.247e-06  | Probably no functional effect   | 51                  |
| 5 | c.427T>G | p.(Tyr143Asp)   | 2  | 1.06 | 0.995 | Probably damaging             | 0.13 | TOLERATED | -                        | Variant of unknown significance | 55                  |
| 5 | c.430T>C | p.(Tyr144His)   | 1  | 4.81 | 1     | Probably damaging             | 0.09 | TOLERATED | -                        | Affects function                | 33                  |
| 5 | c.430T>G | p.(Tyr144Asp)   | 13 | 1.06 | 1     | Probably damaging             | 0.01 | DAMAGING  | -                        | Affects function                | 7,13,19,21,22,26,56 |
| 5 | c.434C>A | p.(Ala145Asp)   | 2  | 0.91 | 0.944 | Possibly damaging             | 0.05 | DAMAGING  | -                        | Affects function                | 35                  |
| 5 | c.444G>T | p.(Glu148Asp)   | 1  | 2.47 | 0.028 | Probably no functional effect | 0.24 | TOLERATED | -                        | Variant of unknown significance | 27                  |
| 5 | c.484A>C | p.(Thr162Pro)   | 1  | 4.81 | 0.994 | Probably damaging             | 0.25 | TOLERATED | 2, 121378, 0, 1.648e-05  | Affects function                | 21                  |
| 6 | c.499G>T | p.(Asp167Tyr)   | 6  | 5.69 | 1     | Probably damaging             | 0.07 | TOLERATED | 1, 119408, 0, 8.375e-06  | Affects function                | 2,4,5,7,21,37       |
| 6 | c.540C>A | p.(His180Gln)   | 1  | 0.61 | 1     | Probably damaging             | 0    | DAMAGING  | -                        | Affects function                | 39                  |
| 6 | c.542C>T | p.(Pro181Leu)   | 2  | 4    | 1     | Probably damaging             | 0.03 | DAMAGING  | -                        | Affects function                | 24                  |
| 6 | c.544C>A | p.(His182Asn)   | 1  | 5.69 | 0.995 | Probably damaging             | 0.1  | TOLERATED | -                        | Affects function                | 27                  |
| 6 | c.544C>T | p.(His182Tyr)   | 9  | 5.69 | 0.995 | Probably damaging             | 0.34 | TOLERATED | 1, 120778, 0, 8.28e-06   | Affects function                | 3,13-15,18,19,21    |
| 6 | c.545A>G | p.(His182Arg)   | 8  | 4.73 | 0.993 | Probably damaging             | 0.32 | TOLERATED | -                        | Affects function                | 13,22,26,41         |
| 6 | c.565G>A | p.(Val189Ile)   | 1  | 5.69 | 0.46  | Possibly damaging             | 0.49 | TOLERATED | 11, 120912, 0, 9.098e-05 | Variant of unknown significance | 41                  |
| 7 | c.715T>G | p.(Tyr239Asp)   | 12 | 4.73 | 1     | Probably damaging             | 0    | DAMAGING  | -                        | Affects                         | 13-16,18,21,36,58   |

|    |           |               |    |       |       |                               |      |           |                           |                                 |                                        |
|----|-----------|---------------|----|-------|-------|-------------------------------|------|-----------|---------------------------|---------------------------------|----------------------------------------|
|    |           |               |    |       |       |                               |      |           |                           | function                        |                                        |
| 8  | c.731G>T  | p.(Gly244Val) | 2  | 6.26  | 1     | Probably damaging             | 0.38 | TOLERATED | -                         | Affects function                | 41                                     |
| 8  | c.746A>G  | p.(Tyr249Cys) | 2  | 3.51  | 1     | Probably damaging             | 0    | DAMAGING  | 5, 120826, 1, 4.138e-05   | Affects function                | 5                                      |
| 8  | c.751G>T  | p.(Val251Phe) | 2  | 6.26  | 1     | Probably damaging             | 0    | DAMAGING  | -                         | Affects function                | 59                                     |
| 9  | c.859G>T  | p.(Val287Phe) | 14 | 3.51  | 0.989 | Probably damaging             | 0.02 | DAMAGING  | -                         | Affects function                | 13,14,21-23,28,41                      |
| 9  | c.864G>T  | p.(Trp288Cys) | 1  | 5.45  | 0.994 | Probably damaging             | 0.16 | TOLERATED | -                         | Affects function                | 41                                     |
| 9  | c.868C>T  | p.(His290Tyr) | 3  | 5.45  | 1     | Probably damaging             | 0.93 | TOLERATED | -                         | Affects function                | 52                                     |
| 9  | c.871A>G  | p.(Ile291Val) | 1  | 0.45  | 0     | Probably no functional effect | 1    | TOLERATED | 2, 121084, 0, 1.652e-05   | Probably no functional effect   | 41                                     |
| 9  | c.881A>C  | p.(Lys294Thr) | 4  | 4.56  | 1     | Probably damaging             | 0.01 | DAMAGING  | 486, 121148, 8, 0.004012  | Probably no functional effect   | 2,16,60                                |
| 9  | c.917C>T  | p.(Thr306Ile) | 1  | 0.89  | 0.999 | Probably damaging             | 0.29 | TOLERATED | -                         | Variant of unknown significance | 63                                     |
| 9  | c.938A>G  | p.(His313Arg) | 1  | 4.4   | 1     | Probably damaging             | 0.01 | DAMAGING  | -                         | Affects function                | 7                                      |
| 9  | c.939T>A  | p.(His313Gln) | 2  | -0.12 | 1     | Probably damaging             | 0    | DAMAGING  | 1, 121400, 0, 8.237e-06   | Affects function                | 52                                     |
| 9  | c.952T>A  | p.(Tyr318Asn) | 3  | 4.4   | 1     | Probably damaging             | 0    | DAMAGING  | 1, 121392, 0, 8.238e-06   | Affects function                | 16,21                                  |
| 9  | c.963T>G  | p.(Asn321Lys) | 12 | 0.12  | 0.013 | Probably no functional effect | 0.27 | TOLERATED | 651, 121402, 18, 0.005362 | Probably no functional effect   | 2,5,11,16,19,38,41,64,65               |
| 9  | c.989G>A  | p.(Cys330Tyr) | 8  | 2.47  | 0.998 | Probably damaging             | 0.72 | TOLERATED | 1, 121412, 0, 8.236e-06   | Variant of unknown significance | 27,32,66                               |
| 9  | c.997G>C  | p.(Gly333Arg) | 1  | 5.29  | 1     | Probably damaging             | 0.01 | DAMAGING  | -                         | Affects function                | 46                                     |
| 10 | c.1022T>C | p.(Leu341Ser) | 29 | 4.436 | 1     | Probably damaging             | 0.02 | DAMAGING  | -                         | Affects function                | 3,6,13,14,21-24,26,51,68               |
| 10 | c.1078G>C | p.(Ala360Pro) | 3  | 5.77  | 0.047 | Probably no functional effect | 0.24 | TOLERATED | -                         | Variant of unknown significance | 11,16                                  |
| 10 | c.1087C>A | p.(Pro363Thr) | 16 | 5.77  | 0.64  | Possibly damaging             | 0.41 | TOLERATED | 2, 121120, 0, 1.651e-05   | Affects function                | 2,5,10,27,32,56                        |
| 10 | c.1102T>C | p.(Tyr368His) | 69 | 4.73  | 1     | Probably damaging             | 0    | DAMAGING  | 8, 121144, 0, 6.604e-05   | Affects function                | 2,4,5,13,14,21,22,25,26,29,36,55,70-72 |
| 10 | c.1103A>G | p.(Tyr368Cys) | 4  | 4.73  | 1     | Probably damaging             | 0.1  | TOLERATED | -                         | Affects function                | 6,34                                   |
| 11 | c.1178C>A | p.(Ala393Glu) | 7  | 5.45  | 1     | Probably damaging             | 0.03 | DAMAGING  | -                         | Affects function                | 15,18,21,28                            |
| 11 | c.1220T>C | p.(Val407Ala) | 1  | 4.48  | 0.426 | Probably no functional effect | 0.88 | TOLERATED | 1, 120798, 0, 8.278e-06   | Variant of unknown significance | 3                                      |
| 11 | c.1223T>C | p.(Leu408Pro) | 10 | 4.48  | 1     | Probably damaging             | 0.01 | DAMAGING  | -                         | Affects function                | 13,16,21-23                            |
| 12 | c.1249G>C | p.(Glu417Gln) | 12 | 5.45  | 1     | Probably damaging             | 0.01 | DAMAGING  | -                         | Affects function                | 13,14,19,22,25,26                      |
| 12 | c.1292A>G | p.(Tyr431Cys) | 5  | 4.48  | 1     | Probably damaging             | 0.05 | DAMAGING  | 1, 120968, 0, 8.267e-06   | Affects function                | 13,21,26,62                            |

|               |           |               |     |      |       |                               |      |           |                           |                               |                  |  |
|---------------|-----------|---------------|-----|------|-------|-------------------------------|------|-----------|---------------------------|-------------------------------|------------------|--|
| 12            | c.1301C>T | p.(Ala434Val) | 11  | 5.45 | 0.026 | Probably no functional effect | 1    | TOLERATED | 846, 120978, 25, 0.006993 | Probably no functional effect | 5,16,27,28,32,41 |  |
| 12            | c.1304A>G | p.(Tyr435Cys) | 1   | 2.87 | 1     | Probably damaging             | 0    | DAMAGING  | -                         | Affects function              | 12               |  |
| 12            | c.1307G>T | p.(Gly436Val) | 2   | 5.45 | 1     | Probably damaging             | 0.07 | TOLERATED | -                         | Affects function              | 2,5              |  |
| 12            | c.1328T>C | p.(Val443Ala) | 3   | 4.48 | 0.871 | Possibly damaging             | 0.38 | TOLERATED | -                         | Affects function              | 21,51            |  |
| 13            | c.1355T>G | p.(Val452Gly) | 1   | 4.89 | 0.996 | Probably damaging             | 0.1  | TOLERATED | -                         | Affects function              | 3                |  |
| 13            | c.1370C>A | p.(Thr457Asn) | 2   | 0.85 | 0     | Probably no functional effect | 0.36 | TOLERATED | 1, 120960, 0, 8.267e-06   | Probably no functional effect | 2,29             |  |
| 13            | c.1380G>C | p.(Trp460Cys) | 1   | 0.86 | 1     | Probably damaging             | 0.03 | DAMAGING  | -                         | Affects function              | 51               |  |
| 13            | c.1409C>T | p.(Pro470Leu) | 2   | 5.94 | 1     | Probably damaging             | 0.01 | DAMAGING  | -                         | Affects function              | 73               |  |
| 13            | c.1418T>A | p.(Val473Asp) | 5   | 4.97 | 1     | Probably damaging             | 0    | DAMAGING  | -                         | Affects function              | 3,18,27,32       |  |
| 13            | c.1430A>G | p.(Asp477Gly) | 23  | 2.3  | 0     | Probably no functional effect | 1    | TOLERATED | -                         | Affects function*             | 74               |  |
| 14            | c.1451G>A | p.(Gly484Asp) | 1   | 5.94 | 1     | Probably damaging             | 0    | DAMAGING  | 2, 120516, 0, 1.66e-05    | Affects function              | 51               |  |
| 14            | c.1543C>T | p.(Arg515Trp) | 8   | 0.53 | 1     | Probably damaging             | 0    | DAMAGING  | 2, 120986, 0, 1.653e-05   | Affects function              | 20,21,30,75      |  |
| 14            | c.1583G>T | p.(Gly528Val) | 1   | 6.02 | 1     | Probably damaging             | 0    | DAMAGING  | -                         | Affects function              | 2                |  |
| 14            | c.1590C>A | p.(Phe530Leu) | 1   | 4.24 | 0.929 | Possibly damaging             | 0.01 | DAMAGING  | -                         | Affects function              | 76               |  |
| 14            | c.1597T>A | p.(Ser533Thr) | 2   | 0.37 | 0     | Probably no functional effect | 0.43 | TOLERATED | 2, 120712, 0, 1.657e-05   | Probably no functional effect | 11,21            |  |
| Total alleles |           |               | 573 |      |       |                               |      |           |                           |                               |                  |  |

AC, allele count; AF, allele frequency; ExAC, exome aggregation consortium; HZ, homozygous individuals; TA, total alleles

\*Variant c.1430A>G; p.(Asp477Gly) is considered as **Affects function** due to its different mutational mechanism in an autosomal dominant manner

### Supplementary Table S7. Splice prediction non-canonical splice site variants in *RPE65*

| Exon | cDNA Change | Protein Change | Allele Count | Splice Site Finder-like   | MaxEntScan               | NNSPLICE                | GeneSplicer             | HSF                       | ExAC (AC, TA, HZ, AF)    | Classification                | Reference No.                                         |
|------|-------------|----------------|--------------|---------------------------|--------------------------|-------------------------|-------------------------|---------------------------|--------------------------|-------------------------------|-------------------------------------------------------|
|      |             |                |              | (0-100)                   | (0-12)                   | (0-1)                   | (0-15)                  | (0-100)                   |                          |                               |                                                       |
|      |             |                |              | ≥70                       | ≥0                       | >0.4                    | ≥0                      | ≥60                       |                          |                               |                                                       |
| 1i   | c.11+5G>A   | p.(?)          | 62           | 78.95 ⇒ —                 | 9.09 ⇒ 1.53<br>(-83.2%)  | 0.96 ⇒ 0.61<br>(-36.4%) | 6.82 ⇒ —                | 84.67 ⇒ 72.51<br>(-14.4%) | 11, 120956, 0, 9.094e-05 | Affects function              | 2,4,5,10,13-15,18,19,21,22,24,26-29,32,50,51,70-72,77 |
| 2i   | c.94+10A>G  | p.(?)          | 1            | = 80.04                   | = 8.08                   | = 0.88                  | 4.89 ⇒ 3.15<br>(-35.6%) | = 86.63                   | -                        | Probably no functional effect | 5                                                     |
| 2i   | c.95-3C>G   | p.(?)          | 6            | 84.15 ⇒ 73.33<br>(-12.9%) | 9.37 ⇒ 0.62<br>(-93.3%)  | 0.97 ⇒ —                | 8.64 ⇒ —                | 91.38 ⇒ 81.08<br>(-11.3%) | -                        | Affects function              | 78                                                    |
| 6i   | c.643+4A>G  | p.(?)          | 1            | 95.64 ⇒ 85.56<br>(-10.5%) | 10.67 ⇒ 8.56<br>(-19.8%) | 0.98 ⇒ 0.83<br>(-15.4%) | -                       | 98.84 ⇒ 90.50<br>(-8.4%)  | -                        | Affects function              | 2                                                     |
| 7i   | c.725+4A>G  | p.(?)          | 5            | 83.18 ⇒ 73.10<br>(-12.1%) | 6.43 ⇒ 3.16<br>(-50.8%)  | -                       | 0.70 ⇒ —                | 86.00 ⇒ 77.66<br>(-9.7%)  | -                        | Affects function              | 13,19,21,22                                           |
| 7i   | c.726-3C>A  | p.(?)          | 1            | 78.75 ⇒ —                 | 9.36 ⇒ 6.22<br>(-33.6%)  | 0.60 ⇒ —                | -                       | 84.53 ⇒ 75.14<br>(-11.1%) | 2, 120388, 0, 1.661e-05  | Affects function              | 79                                                    |

## References Supplementary Tables S4 - S7

1. Sohoki MM, Browne SJ, Sullivan LS *et al*: Mutations in a new photoreceptor-pineal gene on 17p cause leber congenital amaurosis. *Nat gen* 2000;24:79-83. *Am J Ophthalmol* 2000; **129**: 834-835.
2. Perrault I, Delphin N, Hanein S *et al*: Spectrum of NPHP6/CEP290 mutations in Leber congenital amaurosis and delineation of the associated phenotype. *Hum Mutat* 2007; **28**: 416.
3. den Hollander AI, Koenekoop RK, Yzer S *et al*: Mutations in the CEP290 (NPHP6) gene are a frequent cause of Leber congenital amaurosis. *Am J Hum Genet* 2006; **79**: 556-561.
4. den Hollander AI, Davis J, van der Velde-Visser SD *et al*: CRB1 mutation spectrum in inherited retinal dystrophies. *Hum Mutat* 2004; **24**: 355-369.
5. Lotery AJ, Jacobson SG, Fishman GA *et al*: Mutations in the CRB1 gene cause Leber congenital amaurosis. *Arch Ophthalmol* 2001; **119**: 415-420.
6. den Hollander AI, ten Brink JB, de Kok YJ *et al*: Mutations in a human homologue of *Drosophila* crumbs cause retinitis pigmentosa (RP12). *Nat Genet* 1999; **23**: 217-221.
7. Zernant J, Kulm M, Dharmaraj S *et al*: Genotyping microarray (disease chip) for Leber congenital amaurosis: detection of modifier alleles. *Invest Ophthalmol Vis Sci* 2005; **46**: 3052-3059.
8. Perrault I, Rozet JM, Calvas P *et al*: Retinal-specific guanylate cyclase gene mutations in Leber's congenital amaurosis. *Nat Genet* 1996; **14**: 461-464.
9. Lotery AJ, Namperumalsamy P, Jacobson SG *et al*: Mutation analysis of 3 genes in patients with Leber congenital amaurosis. *Arch Ophthalmol* 2000; **118**: 538-543.
10. Garcia-Hoyos M, Auz-Alexandre CL, Almoguera B *et al*: Mutation analysis at codon 838 of the Guanylate Cyclase 2D gene in Spanish families with autosomal dominant cone, cone-rod, and macular dystrophies. *Mol Vis* 2011; **17**: 1103-1109.

11. Thompson DA, Janecke AR, Lange J *et al*: Retinal degeneration associated with RDH12 mutations results from decreased 11-cis retinal synthesis due to disruption of the visual cycle. *Hum Mol Genet* 2005; **14**: 3865-3875.
12. Perrault I, Hanein S, Gerber S *et al*: Retinal dehydrogenase 12 (RDH12) mutations in leber congenital amaurosis. *Am J Hum Genet* 2004; **75**: 639-646.
13. Gu SM, Thompson DA, Srikumari CR *et al*: Mutations in RPE65 cause autosomal recessive childhood-onset severe retinal dystrophy. *Nat Genet* 1997; **17**: 194-197.
14. Jacobson SG, Aleman TS, Cideciyan AV *et al*: Identifying photoreceptors in blind eyes caused by RPE65 mutations: Prerequisite for human gene therapy success. *Proc Natl Acad Sci U S A* 2005; **102**: 6177-6182.
15. Morimura H, Fishman GA, Grover SA, Fulton AB, Berson EL, Dryja TP: Mutations in the RPE65 gene in patients with autosomal recessive retinitis pigmentosa or leber congenital amaurosis. *Proc Natl Acad Sci U S A* 1998; **95**: 3088-3093.
16. Redmond TM, Poliakov E, Kuo S, Chander P, Gentleman S: RPE65, visual cycle retinol isomerase, is not inherently 11-cis-specific: support for a carbocation mechanism of retinol isomerization. *J Biol Chem* 2010; **285**: 1919-1927.
17. Mamatha G, Srilekha S, Meenakshi S, Kumaramanickavel G: Screening of the RPE65 gene in the Asian Indian patients with leber congenital amaurosis. *Ophthalmic Genet* 2008; **29**: 73-78.
18. Lorenz B, Gyurus P, Preising M *et al*: Early-onset severe rod-cone dystrophy in young children with RPE65 mutations. *Invest Ophthalmol Vis Sci* 2000; **41**: 2735-2742.
19. Stone EM: Leber congenital amaurosis - a model for efficient genetic testing of heterogeneous disorders: LXIV Edward Jackson Memorial Lecture. *Am J Ophthalmol* 2007; **144**: 791-811.
20. Kondo H, Qin M, Mizota A *et al*: A homozygosity-based search for mutations in patients with autosomal recessive retinitis pigmentosa, using microsatellite markers. *Invest Ophthalmol Vis Sci* 2004; **45**: 4433-4439.

21. Dharmaraj SR, Silva ER, Pina AL *et al*: Mutational analysis and clinical correlation in Leber congenital amaurosis. *Ophthalmic Genet* 2000; **21**: 135-150.
22. Thompson DA, Gyurus P, Fleischer LL *et al*: Genetics and phenotypes of RPE65 mutations in inherited retinal degeneration. *Invest Ophthalmol Vis Sci* 2000; **41**: 4293-4299.
23. Ripamonti C, Henning GB, Ali RR *et al*: Nature of the visual loss in observers with Leber's congenital amaurosis caused by specific mutations in RPE65. *Invest Ophthalmol Vis Sci* 2014; **55**: 6817-6828.
24. Henderson RH, Waseem N, Searle R *et al*: An assessment of the apex microarray technology in genotyping patients with Leber congenital amaurosis and early-onset severe retinal dystrophy. *Invest Ophthalmol Vis Sci* 2007; **48**: 5684-5689.
25. Koenekoop RK, Sui R, Sallum J *et al*: Oral 9-cis retinoid for childhood blindness due to Leber congenital amaurosis caused by RPE65 or LRAT mutations: an open-label phase 1b trial. *Lancet* 2014; **384**: 1513-1520.
26. Simonelli F, Ziviello C, Testa F *et al*: Clinical and molecular genetics of Leber's congenital amaurosis: a multicenter study of Italian patients. *Invest Ophthalmol Vis Sci* 2007; **48**: 4284-4290.
27. Marlhens F, Griffoin JM, Bareil C, Arnaud B, Claustres M, Hamel CP: Autosomal recessive retinal dystrophy associated with two novel mutations in the RPE65 gene. *Eur J Hum Genet* 1998; **6**: 527-531.
28. Lorenz B, Poliakov E, Schambeck M, Friedburg C, Preising MN, Redmond TM: A comprehensive clinical and biochemical functional study of a novel RPE65 hypomorphic mutation. *Invest Ophthalmol Vis Sci* 2008; **49**: 5235-5242.
29. Wang J, Zhang VW, Feng Y *et al*: Dependable and efficient clinical utility of target capture-based deep sequencing in molecular diagnosis of retinitis pigmentosa. *Invest Ophthalmol Vis Sci* 2014; **55**: 6213-6223.
30. Sitorus RS, Lorenz B, Preising MN: Analysis of three genes in Leber congenital amaurosis in Indonesian patients. *Vision Res* 2003; **43**: 3087-3093.

31. Jacobson SG, Aleman TS, Cideciyan AV *et al*: Defining the residual vision in leber congenital amaurosis caused by RPE65 mutations. *Invest Ophthalmol Vis Sci* 2009; **50**: 2368-2375.
32. Jacobson SG, Cideciyan AV, Ratnakaram R *et al*: Gene therapy for leber congenital amaurosis caused by RPE65 mutations: safety and efficacy in 15 children and adults followed up to 3 years. *Arch Ophthalmol* 2012; **130**: 9-24.
33. Pasadhika S, Fishman GA, Stone EM *et al*: Differential macular morphology in patients with RPE65-, CEP290-, GUCY2D-, and AIPL1-related Leber congenital amaurosis. *Invest Ophthalmol Vis Sci* 2010; **51**: 2608-2614.
34. Philp AR, Jin M, Li S *et al*: Predicting the pathogenicity of RPE65 mutations. *Hum Mutat* 2009; **30**: 1183-1188.
35. Jacobson SG, Cideciyan AV, Aleman TS *et al*: RDH12 and RPE65, visual cycle genes causing leber congenital amaurosis, differ in disease expression. *Invest Ophthalmol Vis Sci* 2007; **48**: 332-338.
36. Galvin JA, Fishman GA, Stone EM, Koeneke RK: Evaluation of genotype-phenotype associations in leber congenital amaurosis. *Retina* 2005; **25**: 919-929.
37. Simovich MJ, Miller B, Ezzeldin H *et al*: Four novel mutations in the RPE65 gene in patients with Leber congenital amaurosis. *Hum Mutat* 2001; **18**: 164.
38. Oishi M, Oishi A, Gotoh N *et al*: Comprehensive molecular diagnosis of a large cohort of Japanese retinitis pigmentosa and Usher syndrome patients by next-generation sequencing. *Invest Ophthalmol Vis Sci* 2014; **55**: 7369-7375.
39. Jacobson SG, Aleman TS, Cideciyan AV *et al*: Human cone photoreceptor dependence on RPE65 isomerase. *Proc Natl Acad Sci U S A* 2007; **104**: 15123-15128.
40. Jacobson SG, Cideciyan AV, Aleman TS *et al*: Photoreceptor layer topography in children with leber congenital amaurosis caused by RPE65 mutations. *Invest Ophthalmol Vis Sci* 2008; **49**: 4573-4577.



41. Coppieters F, Casteels I, Meire F *et al*: Genetic screening of LCA in Belgium: predominance of CEP290 and identification of potential modifier alleles in AHI1 of CEP290-related phenotypes. *Hum Mutat* 2010; **31**: E1709-1766.
42. Hauswirth WW, Aleman TS, Kaushal S *et al*: Treatment of leber congenital amaurosis due to RPE65 mutations by ocular subretinal injection of adeno-associated virus gene vector: short-term results of a phase I trial. *Hum Gene Ther* 2008; **19**: 979-990.
43. Hanein S, Perrault I, Gerber S *et al*: Leber congenital amaurosis: comprehensive survey of the genetic heterogeneity, refinement of the clinical definition, and genotype-phenotype correlations as a strategy for molecular diagnosis. *Hum Mutat* 2004; **23**: 306-317.
44. Katagiri S, Hayashi T, Kondo M *et al*: RPE65 Mutations in Two Japanese Families with Leber Congenital Amaurosis. *Ophthalmic Genet* 2014; 1-9.
45. Kabir F, Naz S, Riazuddin SA *et al*: Novel mutations in RPE65 identified in consanguineous Pakistani families with retinal dystrophy. *Mol Vis* 2013; **19**: 1554-1564.
46. Perrault I, Rozet JM, Ghazi I *et al*: Different functional outcome of RetGC1 and RPE65 gene mutations in Leber congenital amaurosis. *Am J Hum Genet* 1999; **64**: 1225-1228.
47. Chen Y, Zhang Q, Shen T *et al*: Comprehensive mutation analysis by whole-exome sequencing in 41 Chinese families with Leber congenital amaurosis. *Invest Ophthalmol Vis Sci* 2013; **54**: 4351-4357.
48. Xu F, Dong Q, Liu L *et al*: Novel RPE65 mutations associated with Leber congenital amaurosis in Chinese patients. *Mol Vis* 2012; **18**: 744-750.
49. Fu Q, Wang F, Wang H *et al*: Next-generation sequencing-based molecular diagnosis of a Chinese patient cohort with autosomal recessive retinitis pigmentosa. *Invest Ophthalmol Vis Sci* 2013; **54**: 4158-4166.
50. Neveling K, Collin RW, Gilissen C *et al*: Next-generation genetic testing for retinitis pigmentosa. *Hum Mutat* 2012; **33**: 963-972.

51. Lorenz B, Wabbels B, Wegscheider E, Hamel CP, Drexler W, Preising MN: Lack of fundus autofluorescence to 488 nanometers from childhood on in patients with early-onset severe retinal dystrophy associated with mutations in RPE65. *Ophthalmology* 2004; **111**: 1585-1594.
52. den Hollander AI, Lopez I, Yzer S *et al*: Identification of novel mutations in patients with Leber congenital amaurosis and juvenile RP by genome-wide homozygosity mapping with SNP microarrays. *Invest Ophthalmol Vis Sci* 2007; **48**: 5690-5698.
53. Khan AO, Al-Mesfer S, Al-Turkmani S, Bergmann C, Bolz HJ: Genetic analysis of strictly defined Leber congenital amaurosis with (and without) neurodevelopmental delay. *Br J Ophthalmol* 2014; **98**: 1724-1728.
54. Li Y, Wang H, Peng J *et al*: Mutation survey of known LCA genes and loci in the Saudi Arabian population. *Invest Ophthalmol Vis Sci* 2009; **50**: 1336-1343.
55. Bereta G, Kiser PD, Golczak M *et al*: Impact of retinal disease-associated RPE65 mutations on retinoid isomerization. *Biochemistry* 2008; **47**: 9856-9865.
56. Seong MW, Kim SY, Yu YS, Hwang JM, Kim JY, Park SS: Molecular characterization of Leber congenital amaurosis in Koreans. *Mol Vis* 2008; **14**: 1429-1436.
57. El Matri L, Ambresin A, Schorderet DF *et al*: Phenotype of three consanguineous Tunisian families with early-onset retinal degeneration caused by an R91W homozygous mutation in the RPE65 gene. *Graefes Arch Clin Exp Ophthalmol* 2006; **244**: 1104-1112.
58. Eisenberger T, Neuhaus C, Khan AO *et al*: Increasing the yield in targeted next-generation sequencing by implicating CNV analysis, non-coding exons and the overall variant load: the example of retinal dystrophies. *PLoS One* 2013; **8**: e78496.
59. Poehner WJ, Fossarello M, Rapoport AL *et al*: A homozygous deletion in RPE65 in a small Sardinian family with autosomal recessive retinal dystrophy. *Mol Vis* 2000; **6**: 192-198.

60. Li L, Xiao X, Li S *et al*: Detection of variants in 15 genes in 87 unrelated Chinese patients with Leber congenital amaurosis. *PLoS One* 2011; **6**: e19458.
61. Silva E, Dharmaraj S, Li YY *et al*: A missense mutation in GUCY2D acts as a genetic modifier in RPE65-related Leber Congenital Amaurosis. *Ophthalmic Genet* 2004; **25**: 205-217.
62. Abu-Safieh L, Alrashed M, Anazi S *et al*: Autozygome-guided exome sequencing in retinal dystrophy patients reveals pathogenetic mutations and novel candidate disease genes. *Genome Res* 2013; **23**: 236-247.
63. Schatz P, Preising M, Lorenz B, Sander B, Larsen M, Rosenberg T: Fundus albipunctatus associated with compound heterozygous mutations in RPE65. *Ophthalmology* 2011; **118**: 888-894.
64. Weleber RG, Michaelides M, Trzuppek KM, Stover NB, Stone EM: The phenotype of Severe Early Childhood Onset Retinal Dystrophy (SECORD) from mutation of RPE65 and differentiation from Leber congenital amaurosis. *Invest Ophthalmol Vis Sci* 2011; **52**: 292-302.
65. Verma A, Perumalsamy V, Shetty S, Kulm M, Sundaresan P: Mutational screening of LCA genes emphasizing RPE65 in South Indian cohort of patients. *PLoS One* 2013; **8**: e73172.
66. Yzer S, Leroy BP, De Baere E *et al*: Microarray-based mutation detection and phenotypic characterization of patients with Leber congenital amaurosis. *Invest Ophthalmol Vis Sci* 2006; **47**: 1167-1176.
67. Bonilha VL, Rayborn ME, Li Y, Grossman GH, Berson EL, Hollyfield JG: Histopathology and functional correlations in a patient with a mutation in RPE65, the gene for retinol isomerase. *Invest Ophthalmol Vis Sci* 2011; **52**: 8381-8392.
68. Sundaresan P, Vijayalakshmi P, Thompson S, Ko AC, Fingert JH, Stone EM: Mutations that are a common cause of Leber congenital amaurosis in northern America are rare in southern India. *Mol Vis* 2009; **15**: 1781-1787.

69. Chen Y, Moiseyev G, Takahashi Y, Ma JX: Impacts of two point mutations of RPE65 from Leber's congenital amaurosis on the stability, subcellular localization and isomerohydrolase activity of RPE65. *FEBS Lett* 2006; **580**: 4200-4204.
70. Marlhens F, Bareil C, Griffoin JM *et al*: Mutations in RPE65 cause Leber's congenital amaurosis. *Nat Genet* 1997; **17**: 139-141.
71. Booij JC, Bakker A, Kulumbetova J *et al*: Simultaneous mutation detection in 90 retinal disease genes in multiple patients using a custom-designed 300-kb retinal resequencing chip. *Ophthalmology* 2011; **118**: 160-167 e161-163.
72. McKibbin M, Ali M, Mohamed MD *et al*: Genotype-phenotype correlation for leber congenital amaurosis in Northern Pakistan. *Arch Ophthalmol* 2010; **128**: 107-113.
73. Glockle N, Kohl S, Mohr J *et al*: Panel-based next generation sequencing as a reliable and efficient technique to detect mutations in unselected patients with retinal dystrophies. *Eur J Hum Genet* 2014; **22**: 99-104.
74. Wang F, Wang H, Tuan HF *et al*: Next generation sequencing-based molecular diagnosis of retinitis pigmentosa: identification of a novel genotype-phenotype correlation and clinical refinements. *Hum Genet* 2014; **133**: 331-345.
75. Al-Khayer K, Hagstrom S, Pauer G, Zegarra H, Sears J, Traboulsi EI: Thirty-year follow-up of a patient with leber congenital amaurosis and novel RPE65 mutations. *Am J Ophthalmol* 2004; **137**: 375-377.
76. Huang XF, Huang F, Wu KC *et al*: Genotype-phenotype correlation and mutation spectrum in a large cohort of patients with inherited retinal dystrophy revealed by next-generation sequencing. *Genet Med* 2015; **17**: 271-278.
77. Vallespin E, Cantalapiedra D, Riveiro-Alvarez R *et al*: Mutation screening of 299 Spanish families with retinal dystrophies by Leber congenital amaurosis genotyping microarray. *Invest Ophthalmol Vis Sci* 2007; **48**: 5653-5661.

78. Joseph B, Srinivasan A, Soumitra N *et al*: RPE65 gene: multiplex PCR and mutation screening in patients from India with retinal degenerative diseases. *J Genet* 2002; **81**: 19-23.
79. Porto FB, Perrault I, Hicks D *et al*: Prenatal human ocular degeneration occurs in Leber's congenital amaurosis (LCA2). *J Gene Med* 2002; **4**: 390-396.
80. Coppieters F, De Wilde B, Lefever S *et al*: Massively parallel sequencing for early molecular diagnosis in Leber congenital amaurosis. *Genet Med* 2012; **14**: 576-585.
81. Wang X, Wang H, Sun V *et al*: Comprehensive molecular diagnosis of 179 Leber congenital amaurosis and juvenile retinitis pigmentosa patients by targeted next generation sequencing. *J Med Genet* 2013; **50**: 674-688.
82. Singh HP, Jalali S, Narayanan R, Kannabiran C: Genetic analysis of Indian families with autosomal recessive retinitis pigmentosa by homozygosity screening. *Invest Ophthalmol Vis Sci* 2009; **50**: 4065-4071.
83. Booij JC, Florijn RJ, ten Brink JB *et al*: Identification of mutations in the AIPL1, CRB1, GUCY2D, RPE65, and RPGRIP1 genes in patients with juvenile retinitis pigmentosa. *J Med Genet* 2005; **42**: e67.
84. Yzer S, van den Born LI, Schuil J *et al*: A Tyr368His RPE65 founder mutation is associated with variable expression and progression of early onset retinal dystrophy in 10 families of a genetically isolated population. *J Med Genet* 2003; **40**: 709-713.
85. Felius J, Thompson DA, Khan NW *et al*: Clinical course and visual function in a family with mutations in the RPE65 gene. *Arch Ophthalmol* 2002; **120**: 55-61.
86. Bowne SJ, Humphries MM, Sullivan LS *et al*: A dominant mutation in RPE65 identified by whole-exome sequencing causes retinitis pigmentosa with choroidal involvement. *Eur J Hum Genet* 2011; **19**: 1074-1081.
87. Mo G, Ding Q, Chen Z *et al*: A novel mutation in the RPE65 gene causing Leber congenital amaurosis and its transcriptional expression in vitro. *PLoS One* 2014; **9**: e112400.

88. Thompson DA, McHenry CL, Li Y *et al*: Retinal dystrophy due to paternal isodisomy for chromosome 1 or chromosome 2, with homoallelism for mutations in RPE65 or MERTK, respectively. *Am J Hum Genet* 2002; **70**: 224-229.
89. Jakobsson C, Othman IS, Munier FL, Schorderet DF, Abouzeid H: Cone-rod dystrophy caused by a novel homozygous RPE65 mutation in Leber congenital amaurosis. *Klin Monbl Augenheilkd* 2014; **231**: 405-410.
90. Gonzalez-del Pozo M, Borrego S, Barragan I *et al*: Mutation screening of multiple genes in Spanish patients with autosomal recessive retinitis pigmentosa by targeted resequencing. *PLoS One* 2011; **6**: e27894.
